# Supplementary material for: Genome-Wide Identification of Wheat KNOX Gene Family and Functional Characterization of TaKNOX14-D in Plants
Source: Int J Mol Sci. 2022 Dec 14;23(24):15918. doi: 10.3390/ijms232415918 (PMC9784718; doi:10.3390/ijms232415918)
Supplement: Supplementary file 1 [file ijms-23-15918-s001.zip › Supplementary Table.xlsx]

## Sheet: Supplementary Table S1
Characteristic features of 36 TaKNOX genes
Gene	Sequence ID	Chromosome	AA Length	isoelectric point	Molecular weight of protein	Subcellular Location
TaKNOX1-A	TraesCS1A02G072700.1	1A	307	5.66	33779	nucleus
TaKNOX1-B	TraesCS1A02G072800.1	1A	306	5.4	33144.3	nucleus
TaKNOX1-D	TraesCS1B02G091600.1	1B	307	5.8	33523.8	nucleus
TaKNOX2-A	TraesCS1B02G091700.1	1B	306	5.4	33202.3	nucleus
TaKNOX2-B	TraesCS1B02G135600.1	1B	281	5.88	31432.6	vacuole
TaKNOX2-D	TraesCS1D02G075600.1	1D	306	5.66	33652.8	nucleus
TaKNOX3-B	TraesCS1D02G075700.1	1D	306	5.4	33174.3	nucleus
TaKNOX4-A	TraesCS2A02G267400.1	2A	347	6.09	38522.4	nucleus
TaKNOX4-B	TraesCS2B02G268200.1	2B	347	6.09	38560.5	nucleus
TaKNOX4-D	TraesCS2D02G256400.1	2D	347	5.98	38463.3	nucleus
TaKNOX5-A	TraesCS4A02G251800.1	4A	166	5.15	18107.2	mitochondria
TaKNOX5-B	TraesCS4A02G256700.1	4A	362	6.28	40079.1	nucleus
TaKNOX5-D	TraesCS4A02G291900.1	4A	329	8.61	36155.4	nucleus
TaKNOX6-A1	TraesCS4A02G292000.1	4A	152	6.1	16539.8	chloroplastid
TaKNOX6-A2	TraesCS4B02G021900.1	4B	324	5.8	36308.4	nucleus
TaKNOX6-B	TraesCS4B02G022000.1	4B	300	9.11	33269.5	nucleus
TaKNOX6-D1	TraesCS4B02G057900.1	4B	363	6.28	40193.2	nucleus
TaKNOX6-D2	TraesCS4B02G346100.1	4B	312	5.76	34438	nucleus
TaKNOX7-A	TraesCS4D02G019600.1	4D	340	6.23	38120.8	nucleus
TaKNOX7-B	TraesCS4D02G019800.1	4D	322	6.32	35512.8	nucleus
TaKNOX7-D	TraesCS4D02G019900.1	4D	326	6.08	35765.9	nucleus
TaKNOX8-A	TraesCS4D02G058000.1	4D	362	6.28	40065.1	nucleus
TaKNOX8-B	TraesCS4D02G341000.1	4D	311	5.86	34496.1	nucleus
TaKNOX8-D	TraesCS5A02G405900.1	5A	333	5.9	36772.6	nucleus
TaKNOX9-A	TraesCS5A02G515000.1	5A	312	5.76	34438	nucleus
TaKNOX9-B	TraesCS5B02G410600.1	5B	316	5.96	35314.1	nucleus
TaKNOX9-D	TraesCS5B02G454600.1	5B	176	5.3	20218.7	nucleus
TaKNOX10-B	TraesCS5D02G415900.1	5D	339	5.97	37367.2	nucleus
TaKNOX11-A	TraesCS6A02G145500.1	6A	306	5.72	33472.4	nucleus
TaKNOX12-B	TraesCS6B02G173900.1	6B	298	5.69	32459.3	nucleus
TaKNOX12-D	TraesCS6D02G134800.1	6D	207	6.1	23540.3	nucleus
TaKNOX13-A	TraesCS7A02G511800.1	7A	388	7.66	42478	nucleus
TaKNOX13-B	TraesCS7B02G423100.1	7B	292	5.9	32422.5	nucleus
TaKNOX14-D	TraesCS7D02G501000.1	7D	309	5.69	33986	nucleus
TaKNOX15	TraesCS4A02G292100.1	4A	330	8.61	36332.7	nucleus
TaKNOX16	TraesCS4A02G292200.1	4A	319	5.5	35589.7	nucleus

## Sheet: Supplementary Table S2
Table S3. Gene duplicated TaKNOX genes.
Gene 1	Gene 2	Duplication Type
TaKNOX1-A	TaKNOX1-D	WGD or Segmental
TaKNOX1-B	TaKNOX2-A	WGD or Segmental
TaKNOX1-A	TaKNOX2-D	WGD or Segmental
TaKNOX1-D	TaKNOX2-D	WGD or Segmental
TaKNOX4-A	TaKNOX10-B	WGD or Segmental
TaKNOX4-D	TaKNOX8-D	WGD or Segmental
TaKNOX4-D	TaKNOX9-B	WGD or Segmental
TaKNOX5-B	TaKNOX6-D1	WGD or Segmental
TaKNOX5-D	TaKNOX6-B	WGD or Segmental
TaKNOX16	TaKNOX6-A2	WGD or Segmental
TaKNOX5-B	TaKNOX8-A	WGD or Segmental
TaKNOX5-D	TaKNOX7-B	WGD or Segmental
TaKNOX16	TaKNOX7-A	WGD or Segmental
TaKNOX6-D2	TaKNOX8-B	WGD or Segmental
TaKNOX6-A2	TaKNOX7-A	WGD or Segmental
TaKNOX6-B	TaKNOX7-B	WGD or Segmental
TaKNOX6-D1	TaKNOX8-A	WGD or Segmental
TaKNOX6-D2	TaKNOX9-A	WGD or Segmental
TaKNOX8-B	TaKNOX9-A	WGD or Segmental
TaKNOX8-D	TaKNOX9-B	WGD or Segmental
TaKNOX8-D	TaKNOX10-B	WGD or Segmental
TaKNOX9-B	TaKNOX10-B	WGD or Segmental
TaKNOX11-A	TaKNOX12-B	WGD or Segmental
TaKNOX11-A	TaKNOX12-D	WGD or Segmental
TaKNOX12-B	TaKNOX12-D	WGD or Segmental
TaKNOX12-B	TaKNOX13-A	WGD or Segmental
TaKNOX12-D	TaKNOX13-A	WGD or Segmental
TaKNOX13-A	TaKNOX14-D	WGD or Segmental
TaKNOX13-B	TaKNOX14-D	WGD or Segmental

## Sheet: Supplementary Table S3
Syntenic relationships of wheat KNOX genes with other species
Gene 1	Gene 2
TaKNOX11-A	KNAT4
TaKNOX12-D	KNAT4
TaKNOX1-A	OsKNOX1
TaKNOX1-A	OsKNOX10
TaKNOX1-D	OsKNOX1
TaKNOX1-D	OsKNOX10
TaKNOX2-D	OsKNOX1
TaKNOX2-D	OsKNOX10
TaKNOX4-D	OsKNOX8
TaKNOX4-D	OsKNOX12
TaKNOX5-B	OsKNOX6
TaKNOX6-A1	OsKNOX4
TaKNOX6-D1	OsKNOX6
TaKNOX6-D2	OsKNOX3
TaKNOX7-A	OsKNOX4
TaKNOX8-A	OsKNOX6
TaKNOX8-B	OsKNOX3
TaKNOX8-D	OsKNOX8
TaKNOX9-A	OsKNOX3
TaKNOX9-B	OsKNOX8
TaKNOX10-B	OsKNOX8
TaKNOX11-A	OsKNOX2
TaKNOX11-A	OsKNOX11
TaKNOX12-B	OsKNOX2
TaKNOX12-B	OsKNOX11
TaKNOX12-D	OsKNOX2
TaKNOX12-D	OsKNOX11
TaKNOX14-D	OsKNOX11
TaKNOX1-A	HORVU.MOREX.r3.1HG0016370.1
TaKNOX1-D	HORVU.MOREX.r3.1HG0016370.1
TaKNOX2-D	HORVU.MOREX.r3.1HG0016370.1
TaKNOX4-D	HORVU.MOREX.r3.1HG0016370.1
TaKNOX4-D	HORVU.MOREX.r3.5HG0513530.1
TaKNOX5-B	HORVU.MOREX.r3.4HG0339120.1
TaKNOX5-D	HORVU.MOREX.r3.4HG0333990.1
TaKNOX6-D1	HORVU.MOREX.r3.4HG0339120.1
TaKNOX6-D2	HORVU.MOREX.r3.4HG0412370.1
TaKNOX7-A	HORVU.MOREX.r3.4HG0333990.1
TaKNOX8-A	HORVU.MOREX.r3.4HG0339120.1
TaKNOX8-B	HORVU.MOREX.r3.4HG0412370.1
TaKNOX8-D	HORVU.MOREX.r3.5HG0513530.1
TaKNOX9-B	HORVU.MOREX.r3.5HG0513530.1
TaKNOX10-B	HORVU.MOREX.r3.5HG0513530.1
TaKNOX11-A	HORVU.MOREX.r3.6HG0568300.2
TaKNOX11-A	HORVU.MOREX.r3.7HG0744200.2
TaKNOX12-B	HORVU.MOREX.r3.6HG0568300.2
TaKNOX12-B	HORVU.MOREX.r3.7HG0744200.2
TaKNOX12-D	HORVU.MOREX.r3.6HG0568300.2
TaKNOX8-D	HORVU.MOREX.r3.2HG0154270.1
TaKNOX9-A	HORVU.MOREX.r3.4HG0412370.1
TaKNOX9-B	HORVU.MOREX.r3.2HG0154270.1
TaKNOX10-B	HORVU.MOREX.r3.2HG0154270.1
TaKNOX1-A	ZmKNOX2
TaKNOX1-A	ZmKNOX12
TaKNOX1-D	ZmKNOX12
TaKNOX1-D	ZmKNOX2
TaKNOX2-D	ZmKNOX12
TaKNOX2-D	ZmKNOX2
TaKNOX4-D	ZmKNOX1
TaKNOX4-D	ZmKNOX5
TaKNOX4-D	ZmKNOX11
TaKNOX5-B	ZmKNOX9
TaKNOX5-D	ZmKNOX3
TaKNOX5-D	ZmKNOX8
TaKNOX6-D1	ZmKNOX9
TaKNOX6-D2	ZmKNOX6
TaKNOX6-D2	ZmKNOX15
TaKNOX7-A	ZmKNOX3
TaKNOX7-A	ZmKNOX8
TaKNOX8-A	ZmKNOX9
TaKNOX8-B	ZmKNOX6
TaKNOX8-D	ZmKNOX11
TaKNOX8-D	ZmKNOX5
TaKNOX9-A	ZmKNOX15
TaKNOX9-A	ZmKNOX6
TaKNOX9-B	ZmKNOX5
TaKNOX9-B	ZmKNOX11
TaKNOX10-B	ZmKNOX11
TaKNOX10-B	ZmKNOX5
TaKNOX11-A	ZmKNOX14
TaKNOX11-A	ZmKNOX4
TaKNOX11-A	ZmKNOX16
TaKNOX12-B	ZmKNOX16
TaKNOX12-B	ZmKNOX4
TaKNOX12-B	ZmKNOX14
TaKNOX12-D	ZmKNOX14
TaKNOX12-D	ZmKNOX16

## Sheet: Supplementary Table S4
The plant ID of the species used in study
Gene name	Gene ID
ZmKNOX1	Zm00001d007842_P002
ZmKNOX2	Zm00001d010948_P001
ZmKNOX3	Zm00001d013559_P001
ZmKNOX4	Zm00001d015549_P001
ZmKNOX5	Zm00001d018742_P001
ZmKNOX6	Zm00001d027431_P001
ZmKNOX7	Zm00001d030994_P001
ZmKNOX8	Zm00001d033404_P002
ZmKNOX9	Zm00001d033859_P002
ZmKNOX10	Zm00001d033861_P001
ZmKNOX11	Zm00001d034212_P001
ZmKNOX12	Zm00001d035439_P001
ZmKNOX13	Zm00001d040611_P002
ZmKNOX14	Zm00001d046568_P001
ZmKNOX15	Zm00001d048471_P001
ZmKNOX16	Zm00001d053749_P002
ZmKNOX17	Zm00001d051491_P001
OsKNOX1	LOC_Os01g19694.1
OsKNOX2	LOC_Os02g08544.1
OsKNOX3	LOC_Os03g03164.1
OsKNOX4	LOC_Os03g47022.1
OsKNOX5	LOC_Os03g47042.1
OsKNOX6	LOC_Os03g51690.1
OsKNOX7	LOC_Os03g51710.1
OsKNOX8	LOC_Os03g56110.1
OsKNOX9	LOC_Os03g56140.1
OsKNOX10	LOC_Os05g03884.1
OsKNOX11	LOC_Os06g43860.1
OsKNOX12	LOC_Os07g03770.1
OsKNOX13	LOC_Os08g19650.1
KNATM	AT1G14760.1
KNAT6	AT1G23380.1
STM	AT1G62360.1
KNAT7	AT1G62990.1
KNAT2	AT1G70510.1
KNAT1	AT4G08150.1
KNAT5	AT4G32040.1
KNAT4	AT5G11060.1
KNAT3	AT5G25220.1
GmKNOX1	Glyma.09G172851.1.p
GmKNOX2	Glyma.01G028300.1.p
GmKNOX3	Glyma.01G214800.1.p
GmKNOX4	Glyma.02G036900.1.p
GmKNOX5	Glyma.02G269900.2.p
GmKNOX6	Glyma.03G231100.7.p
GmKNOX7	Glyma.04G049500.1.p
GmKNOX8	Glyma.04G064100.1.p
GmKNOX9	Glyma.04G185100.1.p
GmKNOX10	Glyma.05G050600.1.p
GmKNOX11	Glyma.06G065200.1.p
GmKNOX12	Glyma.07G263600.1.p
GmKNOX13	Glyma.08G284300.1.p
GmKNOX14	Glyma.09G007500.1.p
GmKNOX15	Glyma.09G095700.1.p
GmKNOX16	Glyma.10G147000.1.p
GmKNOX17	Glyma.11G027100.1.p
GmKNOX18	Glyma.13G157300.1.p
GmKNOX19	Glyma.14G047000.1.p
GmKNOX20	Glyma.14G091200.1.p
GmKNOX21	Glyma.14G112400.1.p
GmKNOX22	Glyma.15G111900.1.p
GmKNOX23	Glyma.15G202200.1.p
GmKNOX24	Glyma.17G010200.1.p
GmKNOX25	Glyma.17G104800.1.p
GmKNOX26	Glyma.17G132600.1.p
GmKNOX27	Glyma.17G215500.1.p
GmKNOX28	Glyma.17G232205.1.p
GmKNOX29	Glyma.18G141200.1.p
GmKNOX30	Glyma.19G228300.2.p
GmKNOX31	Glyma.20G097500.1.p
SlKNOX1	Solyc01g100510.3
SlKNOX2	Solyc02g081120.3
SlKNOX3	Solyc04g077210.3
SlKNOX4	Solyc05g005090.3
SlKNOX5	Solyc06g072480.3
SlKNOX6	Solyc07g007140.3
SlKNOX7	Solyc08g041820.3
SlKNOX8	Solyc12g010410.2
SiKNOX1	KQK86903
SiKNOX2	KQK87320
SiKNOX3	KQK87324
SiKNOX4	KQK87756
SiKNOX5	KQK92853
SiKNOX6	KQK92854
SiKNOX7	KQL03485
SiKNOX8	KQL11217
SiKNOX9	KQL11218
SiKNOX10	KQL11219
SiKNOX11	KQL13203
SiKNOX12	KQL28418

## Sheet: Supplementary Table S5
Specific conservedcmotifs identified by MEME among wheat TaKNOX proteins
Motif name	Sequence
motif1	DARQKLLHWWZLHYKWPYPSEEDKAALAESTGLDLKQINNWFINQRKRHW
motif2	AGAQEPAADPELDZFMEAYCDMLVKYKEELTRPIQEAAZFL
motif3	ETIKAKIMSHPLYPALLAAYIDCRKVGAPPEVLGRLSALAA
motif4	ELKSZLLQKYSGYLSSLREEFLKKRKKGK
motif5	QTJQSLTGASPGEGTGATMSDDEDN
motif6	GPRAAANTPFFVAMDQYAASTSTSPPEKAPAAAPLPAPEHCGKSSYNRRS
motif7	VDSESNMFDGNDGSDGMGFGP
motif8	PSEDMPFALMEGVHGAGGSGY
motif9	EDLYSIHPGISRGGEGGAACSEASGVAGGASSPPPPPPPAD
motif10	LSGGGGGGGSESSGASASLLZIDAHAADQ

## Sheet: Supplementary Table S6
Gene up/down upsyream and exon location of 36 TaKNOX genes.
Gene name	Length	Cis-element name and gene exon and intron and position	Sequence
TaKNOX1-A	7441	1,6,up/downstream	7,213,exon	214,338,intron	339,461,exon	462,549,intron	550,691,exon	692,6471,intron	6472,6725,exon	6726,6836,intron	6837,7034,exon	7035,7441,up/downstream
TaKNOX5-A	1006	1,14,up/downstream	15,269,exon	270,359,intron	360,473,exon	474,874,intron	875,1006,exon
TaKNOX5-B	7584	1,309,up/downstream	310,697,exon	698,898,intron	899,1021,exon	1022,1121,intron	1122,1266,exon	1267,6716,intron	6717,6949,exon	6950,7066,intron	7067,7270,exon	7271,7584,up/downstream
TaKNOX5-D	4985	1,267,exon	356,469,exon	470,599,intron	600,711,exon	712,4349,intron	4350,4609,exon	4610,4748,intron	4749,4985,exon
TaKNOX6-A1	1485	1,255,exon	351,464,exon	465,562,intron	563,643,exon	644,1485,up/downstream
TaKNOX15	5249	1,41,up/downstream	42,311,exon	312,399,intron	400,513,exon	514,623,intron	624,735,exon	736,4372,intron	4373,4632,exon	4633,4771,intron	4772,5008,exon	5009,5249,up/downstream
TaKNOX16	9951	1,99,up/downstream	100,339,exon	340,514,intron	515,631,exon	632,900,intron	901,1012,exon	1013,8843,intron	8844,9103,exon	9104,9330,intron	9331,9561,exon	9562,9951,up/downstream
TaKNOX6-A2	9844	1,76,up/downstream	77,328,exon	329,520,intron	521,637,exon	638,860,intron	861,972,exon	973,8920,intron	8921,9177,exon	9178,9281,intron	9282,9518,exon	9519,9844,up/downstream
TaKNOX6-B	4629	1,38,up/downstream	39,293,exon	294,382,intron	383,496,exon	497,590,intron	591,702,exon	703,4089,intron	4090,4274,exon	4275,4392,intron	4393,4629,exon
TaKNOX6-D1	7299	1,185,up/downstream	186,576,exon	577,776,intron	777,899,exon	900,999,intron	1000,1144,exon	1145,6249,intron	6250,6482,exon	6483,6758,intron	6759,6962,exon	6963,7299,up/downstream
TaKNOX6-D2	5174	1,180,up/downstream	181,528,exon	529,640,intron	641,761,exon	762,3398,intron	3399,3598,exon	3599,4000,intron	4001,4132,exon	4133,4481,intron	4482,4617,exon	4618,5174,up/downstream
TaKNOX1-B	6217	1,501,up/downstream	502,708,exon	709,837,intron	838,957,exon	958,1062,intron	1063,1204,exon	1205,5469,intron	5470,5723,exon	724,5802,intron	5803,6000,exon	6001,6217,up/downstream
TaKNOX7-A	10108	1,101,up/downstream	102,401,exon	402,526,intron	527,643,exon	644,917,intron	918,1029,exon	1030,9365,intron	9366,9622,exon	9623,9723,intron	9724,9960,exon	9961,10108,up/downstream
TaKNOX7-B	5765	1,146,up/downstream	147,401,exon	402,480,intron	481,594,exon	595,669,intron	670,781,exon	782,4887,intron	4888,5138,exon	5139,5256,intron	5257,5493,exon	5494,5765,up/downstream
TaKNOX7-D	5417	1,194,up/downstream	195,464,exon	465,548,intron	549,662,exon	663,766,intron	767,878,exon	879,4531,intron	4532,4785,exon	4786,4885,intron	4886,5116,exon	5117,5417,up/downstream
TaKNOX8-A	7873	1,256,up/downstream	257,657,exon	658,865,intron	866,970,exon	971,1074,intron	1075,1219,exon	1220,6941,intron	6942,7174,exon	7175,7292,intron	7293,7496,exon	7497,7873,up/downstream
TaKNOX8-B	4979	1,179,up/downstream	180,524,exon	525,643,intron	644,764,exon	765,3291,intron	3292,3491,exon	3492,3838,intron	3839,3970,exon	3971,4311,intron	4312,4447,exon	4448,4979,up/downstream
TaKNOX8-D	6612	1,196,up/downstream	197,488,exon	489,589,intron	590,711,exon	712,814,intron	815,929,exon	930,5525,intron	5526,5767,exon	5768,5872,intron	5873,6103,exon	6104,6612,up/downstream
TaKNOX9-A	5172	1,178,up/downstream	179,526,exon	527,655,intron	656,776,exon	777,3401,intron	3402,3601,exon	3602,4023,intron	4024,4155,exon	4156,4482,intron	4483,4618,exon	4619,5172,up/downstream
TaKNOX9-B	5978	1,348,up/downstream	349,586,exon	587,687,intron	688,809,exon	810,912,intron	913,1027,exon	1028,4187,intron	4188,4432,exon	4433,4541,intron	4542,4772,exon	4773,5978,up/downstream
TaKNOX10-B	5277	1,197,up/downstream	198,498,exon	499,599,intron	600,721,exon	722,828,intron	829,943,exon	944,4282,intron	4283,4527,exon	4528,4634,intron	4635,4871,exon	4872,5277,up/downstream
TaKNOX11-A	5581	1,213,up/downstream	214,513,exon		1176,1296,exon		4093,4283,exon	4395,4526,exon	4527,4607,intron	4608,4744,exon	4745,4833,intron	4834,4873,exon	4874,5581,up/downstream
TaKNOX1-D	7702	1,74,up/downstream	75,281,exon	282,402,intron	403,525,exon	526,613,intron	614,755,exon	756,6865,intron	6866,7119,exon	7120,7230,intron	7231,7428,exon	7429,7702,up/downstream
TaKNOX12-B	6139	1,2,up/downstream	3,277,exon	278,1202,intron	1203,1323,exon	1324,4974,intron	4975,5165,exon	5166,5265,intron	5266,5397,exon	5398,5478,intron	5479,5615,exon	5616,5704,intron	5705,5744,exon	5745,6139,up/downstream
TaKNOX13-A	3933	1,51,up/downstream	52,639,exon	640,1242,intron	1243,1363,exon	1364,2753,intron	2754,2938,exon	2939,3010,intron	3011,3142,exon	3143,3243,intron	3244,3382,exon	3383,3933,up/downstream
TaKNOX13-B	3882	1,234,up/downstream	235,534,exon	535,1177,intron	1178,1298,exon	1299,2648,intron	2649,2833,exon	2834,2922,intron	2923,3054,exon	3055,3162,intron	3163,3301,exon	3302,3882,up/downstream
TaKNOX14-D	4086	1,242,up/downstream	243,557,exon	558,1179,intron	1180,1300,exon	1301,2859,intron	2860,3044,exon	3045,3131,intron	3132,3263,exon	3264,3366,intron	3367,3503,exon	3504,3589,intron	3590,3629,exon	3630,4086,up/downstream
TaKNOX2-B	3123	1,231,exon	875,995,exon	996,2343,intron	2344,2528,exon	2529,2617,intron	2618,2749,exon	2750,2857,intron	2858,2994,exon	2995,3083,intron	3084,3123,exon
TaKNOX9-D	3371	1,995,up/downstream	996,1117,exon	1118,2465,intron	2466,2650,exon	2651,2739,intron	2740,2871,exon	2872,2979,intron	2980,3069,exon	3070,3371,up/downstream
TaKNOX12-D	5146	1,917,up/downstream	918,1039,exon	1040,3869,intron	3870,4060,exon	4061,4170,intron	4171,4302,exon	4303,4383,intron	4384,4520,exon	4521,4609,intron	4610,4649,exon	4650,5146,up/downstream
TaKNOX2-A	6186	1,462,up/downstream	463,669,exon	670,796,intron	797,916,exon	917,1021,intron	1022,1163,exon	1164,5381,intron	5382,5635,exon	5636,5718,intron	5719,5916,exon	5917,6186,up/downstream
TaKNOX2-D	7211	1,109,up/downstream	110,316,exon	317,434,intron	435,554,exon	555,642,intron	643,784,exon	785,6269,intron	6270,6523,exon	6524,6634,intron	6635,6832,exon	6833,7211,up/downstream
TaKNOX3-B	6805	1,486,up/downstream	487,693,exon	694,820,intron	821,940,exon	941,1045,intron	1046,1187,exon	1188,5974,intron	5975,6228,exon	6229,6311,intron	6312,6509,exon	6510,6805,up/downstream
TaKNOX4-A	5230	1,243,up/downstream	244,567,exon	568,673,intron	674,787,exon	788,914,intron	915,1059,exon	1060,4272,intron	4273,4526,exon	4527,4647,intron	4648,4854,exon	4855,5230,up/downstream
TaKNOX4-B	4008	1,324,exon	431,544,exon	545,671,intron	672,816,exon	817,3398,intron	3399,3652,exon	3653,3801,intron	3802,4008,exon
TaKNOX4-D	4711	1,240,up/downstream	241,564,exon	565,670,intron	671,784,exon	785,911,intron	912,1056,exon	1057,3781,intron	3782,4035,exon	4036,4184,intron	4185,4391,exon	4392,4711,up/downstream

## Sheet: Supplementary Table S7
cis-elements in the promoter region location of 36 TaKNOX genes.
Gene name	Length	Cis-element name and gene exon and intron and position	Sequence
TaKNOX1-A	2000	43,52,WUN-motif	530,534,MeJA-responsiveness	535,540,MeJA-responsiveness	732,738,W box	740,749,abscisic acid responsiveness	897,904,abscisic acid responsiveness	997,1002,abscisic acid responsiveness	1178,1183,abscisic acid responsiveness	1350,1354,MeJA-responsiveness	1355,1360,MeJA-responsiveness	1361,1365,abscisic acid responsiveness	1414,1420,abscisic acid responsiveness	1421,1426,abscisic acid responsiveness	1602,1607,MeJA-responsiveness	1608,1612,MeJA-responsiveness	1668,1677,WUN-motif	1827,1836,abscisic acid responsiveness	1876,1883,gibberellin-responsiveness	1926,1931,abscisic acid responsiveness	1949,1958,TC-rich repeats
TaKNOX5-A	2000	84,93,abscisic acid responsiveness	94,95,abscisic acid responsiveness	95,101,abscisic acid responsiveness	277,284,abscisic acid responsiveness	332,337,MeJA-responsiveness	411,419,zein metabolism	456,461,abscisic acid responsiveness	555,560,abscisic acid responsiveness	565,572,MeJA-responsiveness	610,615,abscisic acid responsiveness	700,708,ethylene-responsiveness	960,969,zein metabolism	992,1000,ethylene-responsiveness	1007,1013,W box	1063,1070,MeJA-responsiveness	1361,1368,auxin responsiveness	1390,1397,auxin responsiveness	1475,1482,MeJA-responsiveness	1666,1672,auxin-responsiveness
TaKNOX5-B	2000	256,263,gibberellin-responsiveness	281,290,salicylic acid responsiveness	377,384,auxin responsiveness	647,656,zein metabolism	660,665,ethylene-responsiveness	666,674,ethylene-responsiveness	740,750,zein metabolism	929,938,WUN-motif	991,1000,salicylic acid responsiveness	1080,1085,abscisic acid responsiveness	1086,1091,abscisic acid responsiveness	1503,1506,abscisic acid responsiveness	1507,1510,MeJA-responsiveness	1511,1515,MeJA-responsiveness	1595,1603,ethylene-responsiveness	1675,1683,ethylene-responsiveness	1934,1940,W box	1939,1945,LTR
TaKNOX5-D	2000	474,483,WUN-motif	568,573,ethylene-responsiveness	574,582,ethylene-responsiveness	996,1002,abscisic acid responsiveness	1002,1008,abscisic acid responsiveness	1009,1014,abscisic acid responsiveness	1115,1120,TC-rich repeats	1114,1122,ethylene-responsiveness
TaKNOX6-A1	2000	61,66,MeJA-responsiveness	66,71,MeJA-responsiveness	85,91,auxin-responsiveness	233,242,abscisic acid responsiveness	234,239,abscisic acid responsiveness	238,244,abscisic acid responsiveness	239,244,abscisic acid responsiveness	426,433,abscisic acid responsiveness	481,486,MeJA-responsiveness	486,491,MeJA-responsiveness	704,709,abscisic acid responsiveness	759,764,abscisic acid responsiveness	849,857,ethylene-responsiveness	1109,1118,zein metabolism	114,119,abscisic acid responsiveness	1141,1149,ethylene-responsiveness	1156,1162,W box	1510,1517,auxin responsiveness	1539,1546,auxin responsiveness
TaKNOX15	2000	515,524,WUN-motif	610,618,ethylene-responsiveness	616,624,ethylene-responsiveness	1032,1038,abscisic acid responsiveness	1039,1044,abscisic acid responsiveness	1044,1050,abscisic acid responsiveness	1051,1056,abscisic acid responsiveness	1153,1162,TC-rich repeats	1156,1164,ethylene-responsiveness
TaKNOX16	2000	549,554,MeJA-responsiveness	552,557,MeJA-responsiveness	554,559,MeJA-responsiveness	557,562,MeJA-responsiveness	641,647,LTR	742,748,W box	757,762,MeJA-responsiveness	762,767,MeJA-responsiveness	846,852,CAT-box	943,952,WUN-motif	950,957,auxin responsiveness	1030,1035,MeJA-responsiveness	1035,1040,MeJA-responsiveness	1177,1184,MeJA-responsiveness	1377,1382,MeJA-responsiveness	1382,1387,MeJA-responsiveness
TaKNOX6-A2	2000	169,175,CAT-box	218,227,salicylic acid responsiveness	413,418,abscisic acid responsiveness	720,726,W box	819,824,MeJA-responsiveness	822,827,MeJA-responsiveness	824,829,MeJA-responsiveness	827,832,MeJA-responsiveness	1390,1399,CAT-box	1497,1504,MeJA-responsiveness	1690,1695,MeJA-responsiveness	1695,1700,MeJA-responsiveness	1733,1739,W box	1799,1808,zein metabolism
TaKNOX6-B	2000	169,175,CAT-box	218,227,salicylic acid responsiveness	413,418,abscisic acid responsiveness	720,726,W box	819,824,MeJA-responsiveness	822,827,MeJA-responsiveness	824,829,MeJA-responsiveness	827,832,MeJA-responsiveness	1390,1399,CAT-box	1497,1504,MeJA-responsiveness	1690,1695,MeJA-responsiveness	1695,1700,MeJA-responsiveness	1733,1739,W box	1799,1808,zein metabolism
TaKNOX6-D1	2000	32,39,gibberellin-responsiveness	106,112,abscisic acid responsiveness	180,186,CAT-box	204,210,abscisic acid responsiveness	280,284,MeJA-responsiveness	285,290,MeJA-responsiveness	332,336,MeJA-responsiveness	337,342,MeJA-responsiveness	701,710,zein metabolism	794,804,zein metabolism	1101,1106,abscisic acid responsiveness	1128,1137,salicylic acid responsiveness	1473,1481,ethylene-responsiveness	1554,1562,ethylene-responsiveness	1791,1797,CAT-box	1811,1815,W box	1816,1822,LTR	1931,1940,salicylic acid responsiveness
TaKNOX6-D2	2000	487,493,LTR	665,671,CAT-box	884,890,CAT-box	1063,1068,abscisic acid responsiveness	1136,1144,ethylene-responsiveness	1144,1152,ethylene-responsiveness	1183,1188,MeJA-responsiveness	1188,1193,MeJA-responsiveness	1236,1242,W box	1697,1704,gibberellin-responsiveness
TaKNOX1-B	2000	21,26,MeJA-responsiveness	26,31,MeJA-responsiveness	75,80,MeJA-responsiveness	80,85,MeJA-responsiveness	285,291,auxin-responsiveness	307,312,MeJA-responsiveness	312,317,MeJA-responsiveness	454,463,abscisic acid responsiveness	1089,1096,abscisic acid responsiveness	1120,1126,LTR	1183,1188,MeJA-responsiveness	1186,1195,zein metabolism	1188,1193,MeJA-responsiveness	1190,1195,abscisic acid responsiveness	1272,1278,W box	1285,1292,abscisic acid responsiveness	1299,1305,W box	135,140,MeJA-responsiveness	140,145,MeJA-responsiveness	1516,1525,TC-rich repeats	1686,1693,MeJA-responsiveness	1712,1718,W box
TaKNOX7-A	2000	185,191,CAT-box	437,445,ethylene-responsiveness	452,457,abscisic acid responsiveness	899,904,MeJA-responsiveness	904,909,MeJA-responsiveness	987,993,LTR	1032,1037,MeJA-responsiveness	1092,1097,MeJA-responsiveness	1097,1102,MeJA-responsiveness	1278,1287,WUN-motif	1285,1292,auxin responsiveness	1340,1345,MeJA-responsiveness	1345,1350,MeJA-responsiveness	1516,1523,MeJA-responsiveness	1715,1720,MeJA-responsiveness	1720,1725,MeJA-responsiveness	1824,1833,zein metabolism
TaKNOX7-B	2000	175,181,CAT-box	318,323,MeJA-responsiveness	323,328,MeJA-responsiveness	452,461,abscisic acid responsiveness	453,458,abscisic acid responsiveness	457,463,abscisic acid responsiveness	458,463,abscisic acid responsiveness	700,705,MeJA-responsiveness	705,710,MeJA-responsiveness	879,884,abscisic acid responsiveness	889,896,MeJA-responsiveness	934,939,abscisic acid responsiveness	1024,1032,ethylene-responsiveness	1138,1143,abscisic acid responsiveness	127,136,abscisic acid responsiveness	1283,1292,zein metabolism	1315,1323,ethylene-responsiveness	1330,1336,W box	1386,1393,MeJA-responsiveness	1680,1687,auxin responsiveness	1765,1772,MeJA-responsiveness
TaKNOX7-D	2000	373,382,WUN-motif	465,473,ethylene-responsiveness	471,479,ethylene-responsiveness	633,642,zein metabolism	997,1006,TC-rich repeats	1096,1101,MeJA-responsiveness	1101,1106,MeJA-responsiveness
TaKNOX8-A	2000	321,326,abscisic acid responsiveness	323,328,MeJA-responsiveness	328,333,MeJA-responsiveness	415,421,CAT-box	482,491,zein metabolism	487,492,abscisic acid responsiveness	489,494,MeJA-responsiveness	494,499,MeJA-responsiveness	520,526,auxin-responsiveness	564,570,CAT-box	917,922,abscisic acid responsiveness	1263,1268,MeJA-responsiveness	1268,1273,MeJA-responsiveness	1409,1418,TC-rich repeats	1595,1602,auxin responsiveness	1652,1661,WUN-motif	1677,1686,salicylic acid responsiveness	1678,1684,LTR	1862,1868,CAT-box	1882,1888,W box
TaKNOX8-B	2000	463,469,LTR	641,647,CAT-box	864,870,CAT-box	1124,1132,ethylene-responsiveness	1136,1145,WUN-motif	1163,1168,MeJA-responsiveness	1168,1173,MeJA-responsiveness	1216,1222,W box	1449,1458,abscisic acid responsiveness	1856,1865,zein metabolism
TaKNOX8-D	2000	10,16,CAT-box	106,112,abscisic acid responsiveness	107,112,abscisic acid responsiveness	205,214,salicylic acid responsiveness	326,331,MeJA-responsiveness	331,336,MeJA-responsiveness	341,346,MeJA-responsiveness	346,351,MeJA-responsiveness	353,358,MeJA-responsiveness	358,363,MeJA-responsiveness	609,618,TC-rich repeats	941,947,auxin-responsiveness	1136,1141,MeJA-responsiveness	1141,1146,MeJA-responsiveness	1216,1221,MeJA-responsiveness	1221,1226,MeJA-responsiveness	1423,1429,abscisic acid responsiveness	1430,1435,abscisic acid responsiveness	1719,1725,abscisic acid responsiveness	1720,1725,abscisic acid responsiveness	1800,1809,salicylic acid responsiveness	1822,1828,abscisic acid responsiveness	1823,1828,abscisic acid responsiveness	1837,1846,abscisic acid responsiveness	1842,1848,abscisic acid responsiveness	1843,1848,abscisic acid responsiveness
TaKNOX9-A	2000	24,29,MeJA-responsiveness	29,34,MeJA-responsiveness	175,181,LTR	205,214,abscisic acid responsiveness	353,359,CAT-box	552,558,CAT-box	823,831,ethylene-responsiveness	915,921,W box	1376,1383,gibberellin-responsiveness	1860,1869,zein metabolism
TaKNOX9-B	2000	135,140,abscisic acid responsiveness	154,163,TC-rich repeats	209,214,MeJA-responsiveness	214,219,MeJA-responsiveness	322,331,TC-rich repeats	323,329,abscisic acid responsiveness	330,335,abscisic acid responsiveness	927,933,auxin-responsiveness	1214,1223,zein metabolism	1290,1296,abscisic acid responsiveness	1297,1302,abscisic acid responsiveness	1444,1450,LTR	1511,1516,MeJA-responsiveness	1516,1521,MeJA-responsiveness	154,163,TC-rich repeats	1889,1898,salicylic acid responsiveness	1924,1933,abscisic acid responsiveness	1930,1935,abscisic acid responsiveness	1935,1941,abscisic acid responsiveness
TaKNOX10-B	2000	85,90,abscisic acid responsiveness	198,206,ethylene-responsiveness	340,345,MeJA-responsiveness	345,350,MeJA-responsiveness	433,440,MeJA-responsiveness	555,560,MeJA-responsiveness	560,565,MeJA-responsiveness	664,673,TC-rich repeats	667,676,WUN-motif	709,716,gibberellin-responsiveness	959,966,gibberellin-responsiveness	1261,1267,auxin-responsiveness	1635,1640,MeJA-responsiveness	1640,1645,MeJA-responsiveness	1702,1711,abscisic acid responsiveness	1705,1710,abscisic acid responsiveness	1733,1738,abscisic acid responsiveness	1760,1769,TC-rich repeats	1841,1850,abscisic acid responsiveness	1847,1852,abscisic acid responsiveness
TaKNOX11-A	2000	190,199,salicylic acid responsiveness	506,512,auxin-responsiveness	646,651,MeJA-responsiveness	651,656,MeJA-responsiveness	721,727,auxin-responsiveness	967,973,auxin-responsiveness	1114,1120,W box	1161,1166,MeJA-responsiveness	1166,1171,MeJA-responsiveness	1228,1233,MeJA-responsiveness	1233,1238,MeJA-responsiveness	1313,1318,MeJA-responsiveness	1318,1323,MeJA-responsiveness	1404,1413,salicylic acid responsiveness	1534,1539,MeJA-responsiveness	1539,1544,MeJA-responsiveness	1541,1546,abscisic acid responsiveness	1546,1552,CAT-box	1552,1558,W box	1603,1609,LTR	1641,1647,LTR	1870,1879,WUN-motif	1872,1880,WUN-motif	1939,1944,abscisic acid responsiveness	1970,1975,MeJA-responsiveness	1975,1980,MeJA-responsiveness
TaKNOX1-D	2000	29,35,CAT-box	437,446,zein metabolism	448,454,W box	683,689,auxin-responsiveness	743,748,MeJA-responsiveness	748,753,MeJA-responsiveness	755,760,MeJA-responsiveness	760,765,MeJA-responsiveness	822,827,MeJA-responsiveness	827,832,MeJA-responsiveness	863,872,WUN-motif	1185,1190,MeJA-responsiveness	1190,1195,MeJA-responsiveness	1202,1207,abscisic acid responsiveness	1288,1294,auxin-responsiveness	1585,1590,MeJA-responsiveness	1587,1592,abscisic acid responsiveness	1590,1595,MeJA-responsiveness	1593,1599,CAT-box	1677,1683,W box	1679,1688,abscisic acid responsiveness	1825,1831,abscisic acid responsiveness	1832,1837,abscisic acid responsiveness	1901,1906,MeJA-responsiveness	1906,1911,MeJA-responsiveness
TaKNOX12-B	2000	207,213,abscisic acid responsiveness	214,219,abscisic acid responsiveness	325,330,MeJA-responsiveness	330,335,MeJA-responsiveness	663.5,672,zein metabolism	864,869,MeJA-responsiveness	869,874,MeJA-responsiveness	1025,1030,abscisic acid responsiveness	1091,1096,MeJA-responsiveness	1096,1101,MeJA-responsiveness	1108,1114,W box	1172,1177,MeJA-responsiveness	1177,1182,MeJA-responsiveness	1424,1429,abscisic acid responsiveness	1455,1460,MeJA-responsiveness	1460,1465,MeJA-responsiveness	1498,1503,MeJA-responsiveness	1503,1508,MeJA-responsiveness	1536,1541,MeJA-responsiveness	1541,1546,MeJA-responsiveness	1593,1599,auxin-responsiveness
TaKNOX13-A	2000	383,389,W box	423,431,zein metabolism	519,525,auxin-responsiveness	614,619,MeJA-responsiveness	619,624,MeJA-responsiveness	1259,1266,MeJA-responsiveness	1280,1286,W box	1334,1340,abscisic acid responsiveness	1341,1346,abscisic acid responsiveness	141,147,CAT-box	1494,1500,LTR	1499,1505,abscisic acid responsiveness	1506,1511,abscisic acid responsiveness	1647,1653,abscisic acid responsiveness	1654,1659,abscisic acid responsiveness	1737,1743,abscisic acid responsiveness	1741,1750,abscisic acid responsiveness	1744,1749,abscisic acid responsiveness
TaKNOX13-B	2000	174,180,LTR	823,829,auxin-responsiveness	827,833,abscisic acid responsiveness	833,839,abscisic acid responsiveness	831,840,abscisic acid responsiveness	834,839,abscisic acid responsiveness	1023,1029,auxin-responsiveness	1420,1427,auxin responsiveness	1601,1607,W box	1682,1688,auxin-responsiveness	1891,1899,WUN-motif	1951,1956,MeJA-responsiveness	1956,1961,MeJA-responsiveness	1958,1967,salicylic acid responsiveness
TaKNOX14-D	2000	689,695,CAT-box	893,900,MeJA-responsiveness	913,919,W box	994,1000,auxin-responsiveness	1263,1269,abscisic acid responsiveness	1270,1275,abscisic acid responsiveness	1464,1470,W box	1726,1732,LTR	1826,1831,MeJA-responsiveness	1831,1836,MeJA-responsiveness	1837,1842,MeJA-responsiveness	1842,1847,MeJA-responsiveness	1978,1986,abscisic acid responsiveness	1981,1987,abscisic acid responsiveness	1988,1993,abscisic acid responsiveness
TaKNOX2-B	2000	150,156,CAT-box	151,160,zein metabolism	587,593,CAT-box	628,636,auxin-responsiveness	634,639,MeJA-responsiveness	639,644,MeJA-responsiveness	946,951,abscisic acid responsiveness	951,957,abscisic acid responsiveness	1135,1144,zein metabolism	1213,1219,CAT-box	129,134,abscisic acid responsiveness	1445,1450,abscisic acid responsiveness	1635,1644,zein metabolism	1974,1979,MeJA-responsiveness	1979,1984,MeJA-responsiveness
TaKNOX9-D	2000	3,10,MeJA-responsiveness	558,565,gibberellin-responsiveness	90,96,auxin-responsiveness	905,914,zein metabolism	944,950,CAT-box	983,989,CAT-box	1215,1220,abscisic acid responsiveness	1862,1867,abscisic acid responsiveness	1405,1414,zein metabolism	1695,1700,MeJA-responsiveness	1700,1705,MeJA-responsiveness	1744,1749,MeJA-responsiveness	1749,1754,MeJA-responsiveness	1791,1800,salicylic acid responsiveness
TaKNOX12-D	2000	36,42,CAT-box	316,325,WUN-motif	413,422,zein metabolism	445,451,auxin-responsiveness	490,499,TC-rich repeats	635,644,zein metabolism	645,649,MeJA-responsiveness	650,654,MeJA-responsiveness	1022,1028,auxin-responsiveness	1246,1255,WUN-motif	1248,1256,WUN-motif	1315,1320,abscisic acid responsiveness	1346,1351,MeJA-responsiveness	1351,1356,MeJA-responsiveness	1381,1386,MeJA-responsiveness	1386,1391,MeJA-responsiveness	1419,1424,MeJA-responsiveness	1424,1429,MeJA-responsiveness	1476,1482,auxin-responsiveness
TaKNOX2-A	2000	3,8,MeJA-responsiveness	8,13,MeJA-responsiveness	842,851,salicylic acid responsiveness	1073,1080,abscisic acid responsiveness	1138,1144,LTR	1295,1301,LTR	1316,1323,abscisic acid responsiveness	1639,1645,W box
TaKNOX2-D	2000	160,167,abscisic acid responsiveness	278,283,MeJA-responsiveness	283,288,MeJA-responsiveness	484,489,MeJA-responsiveness	489,494,MeJA-responsiveness	604,609,MeJA-responsiveness	609,614,MeJA-responsiveness	620,626,W box	734,739,abscisic acid responsiveness	736,742,auxin-responsiveness	866,872,auxin-responsiveness	878,883,MeJA-responsiveness	883,888,MeJA-responsiveness	899,904,MeJA-responsiveness	904,909,MeJA-responsiveness	998,1007,abscisic acid responsiveness	1031,1037,CAT-box	1054,1059,MeJA-responsiveness	1059,1064,MeJA-responsiveness	1078,1083,MeJA-responsiveness	1083,1088,MeJA-responsiveness	1085,1090,abscisic acid responsiveness	1126,1131,MeJA-responsiveness	1131,1136,MeJA-responsiveness	1132,1137,MeJA-responsiveness	1137,1142,MeJA-responsiveness	1141,1146,MeJA-responsiveness	1146,1151,MeJA-responsiveness	1365,1370,MeJA-responsiveness	1370,1375,MeJA-responsiveness	1637,1645,ethylene-responsiveness	1677,1682,MeJA-responsiveness	1682,1687,MeJA-responsiveness	1770,1775,abscisic acid responsiveness	1772,1777,MeJA-responsiveness	1777,1782,MeJA-responsiveness	1841,1846,abscisic acid responsiveness	1849,1858,zein metabolism	1861,1867,W box	1890,1896,W box	1979,1986,gibberellin-responsiveness
TaKNOX3-B	2000	38,44,W box	51,58,abscisic acid responsiveness	200,207,MeJA-responsiveness	347,352,MeJA-responsiveness	352,357,MeJA-responsiveness	652,657,MeJA-responsiveness	657,662,MeJA-responsiveness	938,943,abscisic acid responsiveness	1170,1179,salicylic acid responsiveness	1683,1690,MeJA-responsiveness
TaKNOX4-A	2000	219,225,CAT-box	274,279,MeJA-responsiveness	279,284,MeJA-responsiveness	302,309,gibberellin-responsiveness	361,370,abscisic acid responsiveness	367,372,abscisic acid responsiveness	543,548,MeJA-responsiveness	548,553,MeJA-responsiveness	582,589,gibberellin-responsiveness	607,616,zein metabolism	619,624,MeJA-responsiveness	624,629,MeJA-responsiveness	807,813,W box	920,927,MeJA-responsiveness	947,952,MeJA-responsiveness	952,957,MeJA-responsiveness	1805,1812,auxin responsiveness	1831,1837,CAT-box
TaKNOX4-B	2000	116,122,CAT-box	223,229,W box	316,322,abscisic acid responsiveness	323,328,abscisic acid responsiveness	53,61,ethylene-responsiveness	545,551,CAT-box	596,601,MeJA-responsiveness	601,606,MeJA-responsiveness	717,722,abscisic acid responsiveness	719,724,MeJA-responsiveness	724,729,MeJA-responsiveness	734,740,CAT-box	963,969,auxin-responsiveness	1050,1056,auxin-responsiveness	1060,1065,MeJA-responsiveness	1065,1070,MeJA-responsiveness	1259,1264,MeJA-responsiveness	1264,1269,MeJA-responsiveness	1749,1754,MeJA-responsiveness	1752,1761,zein metabolism	1754,1759,MeJA-responsiveness	1756,1761,abscisic acid responsiveness	1780,1786,CAT-box
TaKNOX4-D	2000	34,39,MeJA-responsiveness	39,44,MeJA-responsiveness	121,128,gibberellin-responsiveness	154,160,abscisic acid responsiveness	160,166,abscisic acid responsiveness	403,410,gibberellin-responsiveness	428,438,zein metabolism	440,445,MeJA-responsiveness	445,450,MeJA-responsiveness	626,632,W box	695,701,CAT-box	696,705,zein metabolism	701,706,MeJA-responsiveness	706,711,MeJA-responsiveness	738,745,MeJA-responsiveness	1073,1081,ethylene-responsiveness	1226,1235,salicylic acid responsiveness	1249,1255,auxin-responsiveness	1475,1484,WUN-motif	1477,1485,WUN-motif	1500,1509,WUN-motif	1625,1631,CAT-box	1828,1834,CAT-box	1989,1994,MeJA-responsiveness	1994,1999,MeJA-responsiveness	1996,2001,abscisic acid responsiveness

## Sheet: Supplementary Table S8
List of putative miRNAs targeted TaKNOX genes identified by psRNATarget online tool.
miRNA_Acc.	Target_Acc.	Expectation	UPE$	miRNA_start	miRNA_end	Target_start	Target_end	miRNA_aligned_fragment	alignment	Target_aligned_fragment	Inhibition
miRNA_Acc.	Target_Acc.	Expectation	UPE$	miRNA_start	miRNA_end	Target_start	Target_end	miRNA_aligned_fragment	alignment	Target_aligned_fragment	Inhibition	Multiplicity
tae-miR9666a-3p	TaKNOX6-A1	5	-1	1	22	359	380	CGGUAGGGCUGUAUGAUGGCGA	::::.::: :::::::	ACCAGUUCAUGCAGACCUACCG	Cleavage	1
tae-miR1122c-3p	TaKNOX16	4.5	-1	1	21	1322	1342	UCUAAUAUUAUGGGACGGAGG	::::: :. :: :::::::	AAUCCGUACUUUAUUAUUAGA	Translation	1
tae-miR9675-3p	TaKNOX6-A2	5	-1	1	21	1189	1209	UUUAUGAUCACUCUCGUUUUG	.::::.:::::::. ::.	ACGAACGGGAGUGAUUUCAAG	Cleavage	1
tae-miR160	TaKNOX6-D2	5	-1	1	21	804	824	UGCCUGGCUCCCUGUAUGCCA	:::. :: :.:.::::::	CCUCAUGGAGAGGGUCAGGCA	Translation	1
tae-miR408	TaKNOX6-D2	5	-1	1	21	197	216	CUGCACUGCCUCUUCCCUGGC	:::::::.:::::: :: ::	ACCAGGGAGGAGGCA-UGGAG	Cleavage	1
tae-miR9674a-5p	TaKNOX1-B	5	-1	1	21	1508	1528	GCAUCAUCCAUCCUACCAUUC	:: :: .::: ::::::::	CAAGGGAGGGAGGGAUGAUGA	Translation	1
tae-miR160	TaKNOX8-B	5	-1	1	21	800	820	UGCCUGGCUCCCUGUAUGCCA	:::. :: :.:.::::::	CCUCAUGGAGAGGGUCAGGCA	Translation	1
tae-miR408	TaKNOX8-B	5	-1	1	21	196	215	CUGCACUGCCUCUUCCCUGGC	:::::::.:::::: :: ::	ACCAGGGAGGAGGCA-UGGAG	Cleavage	1
tae-miR1122c-3p	TaKNOX8-D	5	-1	1	21	1618	1638	UCUAAUAUUAUGGGACGGAGG	::: :::..::: ::: ::	GAUCCAUCCUGUAAGAUUUGA	Cleavage	1
tae-miR408	TaKNOX8-D	5	-1	1	21	638	658	CUGCACUGCCUCUUCCCUGGC	::::::.::: ..: ::.:	UACAGGGAGGAGCUGGCGCGG	Cleavage	1
tae-miR160	TaKNOX9-A	5	-1	1	21	802	822	UGCCUGGCUCCCUGUAUGCCA	:::. :: :.:.::::::	CCUCAUGGAGAGGGUCAGGCA	Translation	1
tae-miR408	TaKNOX9-A	5	-1	1	21	195	214	CUGCACUGCCUCUUCCCUGGC	:::::::.:::::: :: ::	ACCAGGGAGGAGGCA-UGGAG	Cleavage	1
tae-miR9773	TaKNOX9-B	4.5	-1	1	24	44	67	UUUGUUUUUAUGUUAUUUUGUGAA	:::..: :.::::...::::::	CUCAUGAUUUGACAUGGGAACAAA	Cleavage	1
tae-miR408	TaKNOX9-B	5	-1	1	21	736	756	CUGCACUGCCUCUUCCCUGGC	::::::.::: ..: ::.:	UACAGGGAGGAGCUGGCGCGG	Cleavage	1
tae-miR408	TaKNOX10-B	5	-1	1	21	648	668	CUGCACUGCCUCUUCCCUGGC	::::::.::: ..: ::.:	UACAGGGAGGAGCUGGCGCGG	Cleavage	1
tae-miR408	TaKNOX13-A	4.5	-1	1	21	970	990	CUGCACUGCCUCUUCCCUGGC	.::::::.::: .: :::.:	AUCAGGGAGGAGAUACUGCGG	Cleavage	1
tae-miR408	TaKNOX13-B	4.5	-1	1	21	865	885	CUGCACUGCCUCUUCCCUGGC	.::::::.::: .: :::.:	AUCAGGGAGGAGAUACUGCGG	Cleavage	1
tae-miR9780	TaKNOX13-B	5	-1	1	21	1266	1286	CGGGUCGGCGCUGCACGCGGC	.:::: ::.:::.: ::::	UUCGCGCGCGGCGUCUCCCCG	Cleavage	1
tae-miR408	TaKNOX2-B	4.5	-1	1	21	562	582	CUGCACUGCCUCUUCCCUGGC	.::::::.::: .: :::.:	AUCAGGGAGGAGAUACUGCGG	Cleavage	1
tae-miR408	TaKNOX9-D	4.5	-1	1	21	334	354	CUGCACUGCCUCUUCCCUGGC	.::::::.::: .: :::.:	AUCAGGGAGGAGAUACUGCGG	Cleavage	1
tae-miR2275-3p	TaKNOX2-A	3.5	-1	1	22	693	714	UUUGGUUUCCUCCAAUAUCUCG	:: : :.::::::::.:.:..:	CGCGCUGUUGGAGGAGAUCGGA	Cleavage	1
tae-miR2275-3p	TaKNOX3-B	3.5	-1	1	22	717	738	UUUGGUUUCCUCCAAUAUCUCG	:: : :.::::::::.:.:..:	CGCGCUGUUGGAGGAGAUCGGA	Cleavage	1
tae-miR9674a-5p	TaKNOX3-B	5	-1	1	21	1480	1500	GCAUCAUCCAUCCUACCAUUC	:: :: .::: ::::::::	CAAGGGAGGGAGGGAUGAUGA	Translation	1
tae-miR9676-5p	TaKNOX4-A	5	-1	1	22	1602	1623	UGGAUGUCAUCGUGGCCGUACA	::.::.:::::: ::.: .:	GAUAUGGUCACGAUAACGUGUA	Cleavage	1

## Sheet: Supplementary Table S9
Primers used in this study
Gene name		Primer sequence	Product size (bp)	Tm℃ used instudy	Function
K11	F	AGATCAAGAAGGCAGCGGAGG	134	58	qRT-PCR
	R	TTGTAGTGCATCTCCCACCAG
K28	F	ACGCAGCTCGATTCCATCACA	156	60	qRT-PCR
	R	GCCGCCGTATTTCCTCAGCAG
K35	F	GAGGGTGAGAGATCCTTGGTC	145	57	qRT-PCR
	R	ACCAAGCTTTCAGGGTAGACG
K4	F	CCGATGAAATGGTGGGGTCGT	121	59	qRT-PCR
	R	AGCCGCTGTACTTCTTGAGCA
K6	F	CGGCTTGCTCTCATGGACTGG	123	60	qRT-PCR
	R	TGCCGCTTCCTCTGGTTGATG
K2	F	ACCACGAGCTCAAGGAGATGC	156	57	qRT-PCR
	R	ACCAGTCCATGAGAGCAAGCC
K8	F	AACATGCTCGCCAAGTACAGG	122	57	qRT-PCR
	R	GGGTCTATCTCTGGCGGCTCA
K7	F	AGCCGCCAGAGATAGACCCAC	156	59	qRT-PCR
	R	TGTAGTGCAGCTCCCACCAGT
K23	F	ATGCTGGTGAAGTACCGGGAG	145	60	qRT-PCR
	R	CCGTGGGCATCAATCTCAGGA
K30	F	TGATGGGTTGTTGGGAGCTTG	176	58	qRT-PCR
	R	ACTCTTCAGCTCATGCCGAAC
K9	F	CATGGAGTTCCTCAAGCGAGT	154	58	qRT-PCR
	R	CTCAGGTAGCCACTGTACTTC
K18	F	ACGCAACTCAACTCCCTCTCC	156	59	qRT-PCR
	R	CCGTGGGCATCAATCTCAGGA
K25	F	CCAGCTGCTGAGGAAATACGG	137	60	qRT-PCR
	R	AGTTGTTGATCTGCTTCTGGT
K36	F	ATATTGACTGAGGGTGAACGG	142	58	qRT-PCR
	R	TAGCTGCAGTATCCCCGGGAA
K33	F	GGTGAGAGATCCTTGGTCGAG	136	59	qRT-PCR
	R	ACCAAGCCTTCAGAGTAGACG
K29	F	TGGGTCAGATGGTATGGGCTT	141	60	qRT-PCR
	R	TGGGTCAGATGGTATGGGCTT
K33	F	GAGCAAGGCAGCGGATACCA	1038	58	Gene clone
	R	GAGCAAGGCAGCGGATACCA
1302-K33	F	GGACTCTTGACCATGGCGTACCAGTACCAC	930	60	overxpression vector construction
	R	TCAGATCTACCATGGCTACCAGGACTGCTC
pk33	F	TGTTAAGGGCCTCTTTGACT	1781	56	Promter clone
	R	AGGAGGAACCACAGCCATAT
1391z-pk33	F	CGACGGATCCCCGGGTGTTAAGGGCCTCTTTGACT	1811	60	Overxpression vector construction
	R	CAGTGAATTCCCGGGAGGAGGAACCACAGCCATAT
